# Supplementary material for: Clinical characteristics and prognosis of primary leiomyosarcoma of the pancreas: a systematic review
Source: PubMed Central journal article supplement (PMC3874640; doi:10.1186/1477-7819-11-290), 2013-11-12
Supplement: 1477-7819-11-290-S1.pdf [file 1477-7819-11-290-S1.pdf]

**Additional file 1 Reported cases of primary pancreatic leiomyosarcoma in Chinese literature**

| Case | Author | Year | Age(years old)/<br>Gender | Clinical manifestation                         | Size (cm) | Locations | Morphology | Metastasis or invasion                     | Surgery               | Follow up                                |
|------|--------|------|---------------------------|------------------------------------------------|-----------|-----------|------------|--------------------------------------------|-----------------------|------------------------------------------|
| 1    | Zhao   | 1982 | 58/F                      | Mass                                           | 10        | Head      | ...        | Duodenum                                   | Nonresectable         | Died, 3 mon                              |
| 2    | Wei    | 1985 | 48/M                      | Mass,abdominal distention,weight loss, anaemia | 20        | Body-tail | Solid      | stomach , spleen,SMA, transverse mesocolon | Nonresectable         | ...                                      |
| 3    | Feng   | 1988 | 46/F                      | Mass,abdominal pain                            | 14        | Body-tail | Cystic     | Stomach , duodenum, transverse mesocolon   | Nonresectable         | Died, 8 mon                              |
| 4    | Shao   | 1989 | 65/F                      | Jaundice,weight loss                           | 8         | Head      | Mixed      | Hepatoduodenal, ligament                   | PD                    |                                          |
| 5    | Chen   | 1990 | 41/F                      | Mass                                           | 14        | Tail      | Solid      | No                                         | DP                    | Alive, 36 mon                            |
| 6    | Zhang  | 1992 | 52/M                      | Mass                                           | 13        | Body      | Mixed      | Regional invasion                          | Nonresectable         | Died, 4 mon                              |
| 7,8  | Wei    | 1992 | 49/F                      | Mass,diarrhea, anaemia, melena,fever           | 14        | Head      | Solid      | No                                         | PD                    | Alive, 24 mon                            |
|      |        |      | 61/M                      | Mass,anaemia,melena                            | 20        | Head      | Solid      | No                                         | PD                    | Alive, 36 mon                            |
| 9    | Du     | 1993 | 55/M                      | Mass,gastrointestinal bleeding,cachexia        | 5         | Body      | Solid      | Stomach                                    | DP+Gastrostomy        | spread to multiple organs, died at 8 mon |
| 10   | Liu    | 1993 | 56/F                      | Abdominal pain, loss of appetite               | 10        | Body-tail | Mixed      | No                                         | DP+splenectomy        | ...                                      |
| 11   | Zhang  | 1994 | 46/F                      | Mass                                           | 16        | Tail      | Solid      | No                                         | Caudal pancreatectomy | Alive, 6 mon                             |
| 12   | Dong   | 1994 | 41/F                      | Mass                                           | 26        | Body-tail | Solid      | No                                         | DP+splenectomy        | ...                                      |

|           |       |      |      |                                                                |     |           |        |                                |                             |                                           |
|-----------|-------|------|------|----------------------------------------------------------------|-----|-----------|--------|--------------------------------|-----------------------------|-------------------------------------------|
| <b>13</b> | Zhang | 1997 | 53/F | Mass, weight loss, vomiting, anaemia gastrointestinal bleeding | 25  | Tail      | Cystic | No                             | Cystectomy                  | spread to multiple organs, died at 16 mon |
| <b>14</b> | Yu    | 1998 | 45/M | Mass, weight loss, abdominal distention                        | 18  | Head      | Mixed  | PV, SMA, SMV                   | Partial resection           | ...                                       |
| <b>15</b> | Wang  | 1998 | 45/M | Mass, abdominal distention                                     | 18  | Head      | ...    | SMA, SMV, transverse mesocolon | Nonresectable               | Died, 6 mon                               |
| <b>16</b> | Wang  | 1998 | 63/M | Mass                                                           | 14  | Body-tail | Cystic | No                             | DP                          | Died, 12 mon                              |
| <b>17</b> | Qian  | 2001 | 68/M | Mass, fever, anaemia                                           | 30  | Tail      | Cystic | Stomach, spleen                | DP+splenectomy +Gastrostomy | ...                                       |
| <b>18</b> | Hua   | 2005 | 40/M | Mass, abdominal pain                                           | 7.8 | Head      | Mixed  | Widespread metastases          | Nonresectable               | ...                                       |
| <b>19</b> | Tang  | 2009 | 51/F | Mass                                                           | 8   | Body-tail | Mixed  | No                             | DP                          | Alive, 39 mon                             |
| <b>20</b> | Wang  | 2012 | 15/F | Abdominal pain, Jaundice                                       | 8   | Head      | Mixed  | No                             | PD                          | Alive, 48 mon                             |

... The data are not recorded in the article.

Abbreviations: SMA, superior mesenteric artery; SMV, superior mesenteric vein; PV, portal vein; PD, pancreatoduodenectomy; DP, distal pancreatectomy, mon, month.
